# Supplementary material for: Cobalt/nitrogen codoped carbon nanosheets derived from catkins as a high performance non-noble metal electrocatalyst for oxygen reduction reaction and hydrogen evolution reaction
Source: Royal Society of Chemistry journal article supplement (doi:10.1039/d0ra08750e), 2020-01-01
Supplement: d0ra08750e1.pdf [file d0ra08750e1.pdf]

## Supporting Information

### **Cobalt/nitrogen Codoped Carbon Nanosheets Derived from Catkin as a High Performance Non-Noble Metal Electrocatalyst for Oxygen Reduction Reaction and Hydrogen Evolution Reaction\*\***

Luting Song<sup>a,b</sup>, Jinqun Chang<sup>a</sup>, Yanhong Ma<sup>a</sup>, Xinghua Tan<sup>a,b</sup>, Yuanqing Xu<sup>a</sup>, Limin Guo<sup>a,b</sup>, Zhexue Chen<sup>a</sup>, Tingqiao Zhao<sup>a,b</sup>, Yueqi Li<sup>a</sup>, Yanlin Liu<sup>a</sup>, Yong Zhang<sup>a,\*</sup> and Weiguo Chu<sup>a,b,\*</sup>

---

<sup>a</sup> Nanofabrication Laboratory, CAS Key Laboratory for Nanosystems and Hierarchical Fabrication, CAS Center for Excellence in Nanoscience, National Center for Nanoscience and Technology, Beijing, 100190, PR China.

<sup>b</sup> Center of Materials Science and Optoelectronics Engineering, University of Chinese Academy of Sciences, Beijing 100049, P. R. China

E-mail: [wgchu@nanoctr.cn](mailto:wgchu@nanoctr.cn), [zhangyong@nanoctr.cn](mailto:zhangyong@nanoctr.cn).

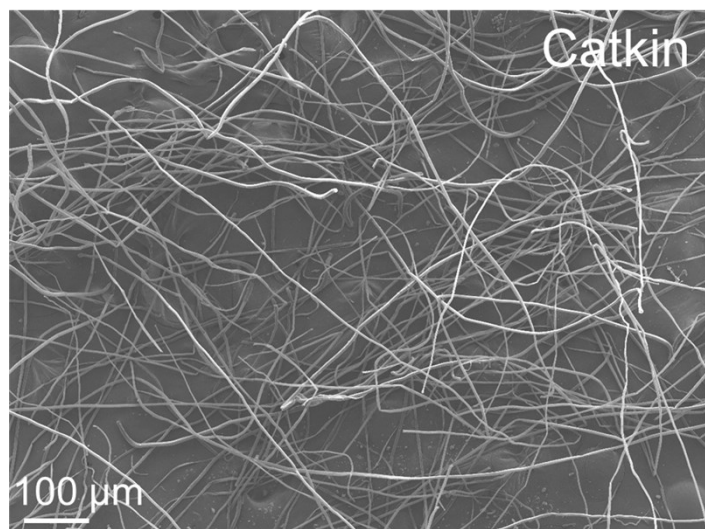

Figure S1. SEM image of pristine catkins.

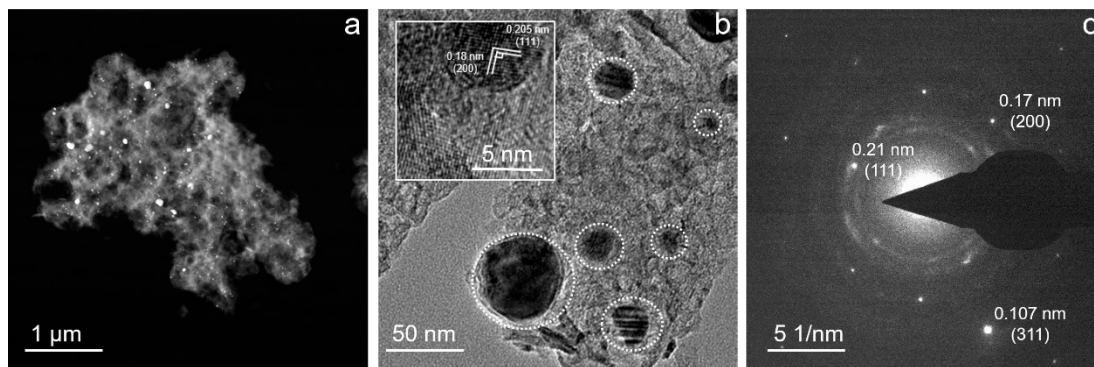

Figure S2. (a) HAADF-STEM and (b) HRTEM images (the inset: the enlarged HRTEM image of the Co nanoparticles), and (c) SAED pattern of CoNPs-Co/N-CNSs-800.

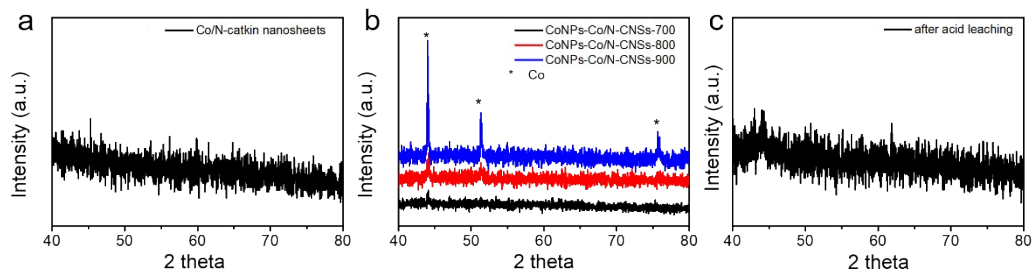

Figure S3. XRD patterns of (a) Co/N-catkin nanosheets, (b) CoNPs-Co/N-CNSs-700, CoNPs-Co/N-CNSs-800 and CoNPs-Co/N-CNSs-900, and (c) CoNPs-Co/N-CNSs-800 subject to acid leaching.

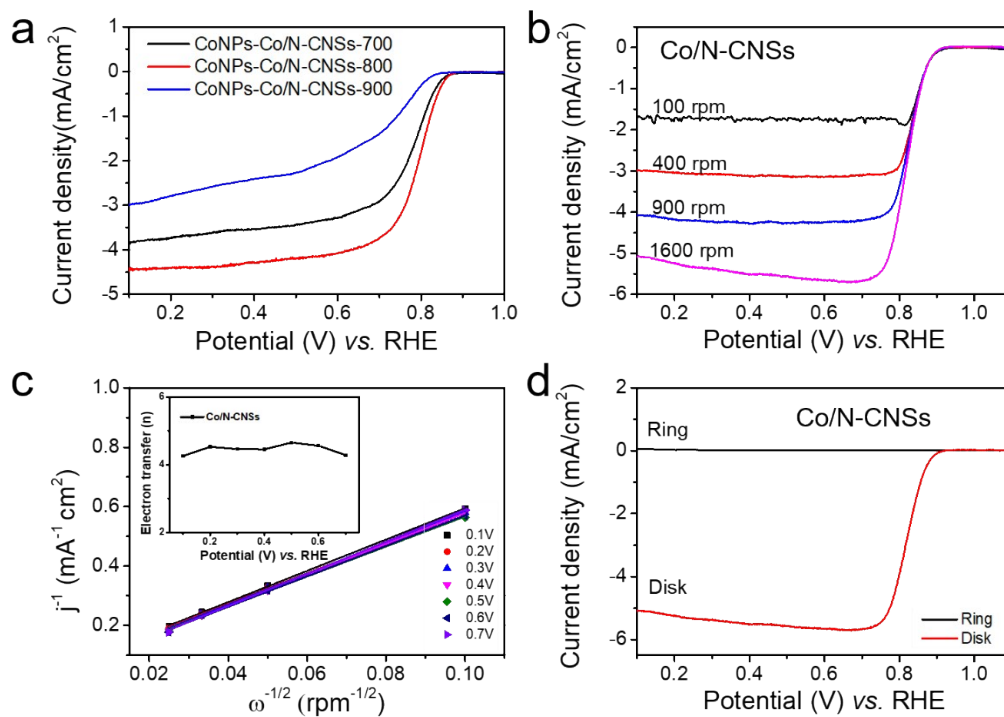

Figure S4. ORR polarization plots of CoNPs-Co/N-CNSs-700, CoNPs-Co/N-CNSs-800, and CoNPs-Co/N-CNSs-900. (b) LSV curves of Co/N-CNSs-800 at different rotating speeds from 100 to 1600 rpm. (c) The corresponding Koutecky-Levich plots of Co/N-CNSs-800 from 0.1 to 0.7 V (vs. RHE). The inset of S4c shows the electron-transfer number as a function of potential. (d)  $\text{H}_2\text{O}_2$  yield of Co/N-CNSs.

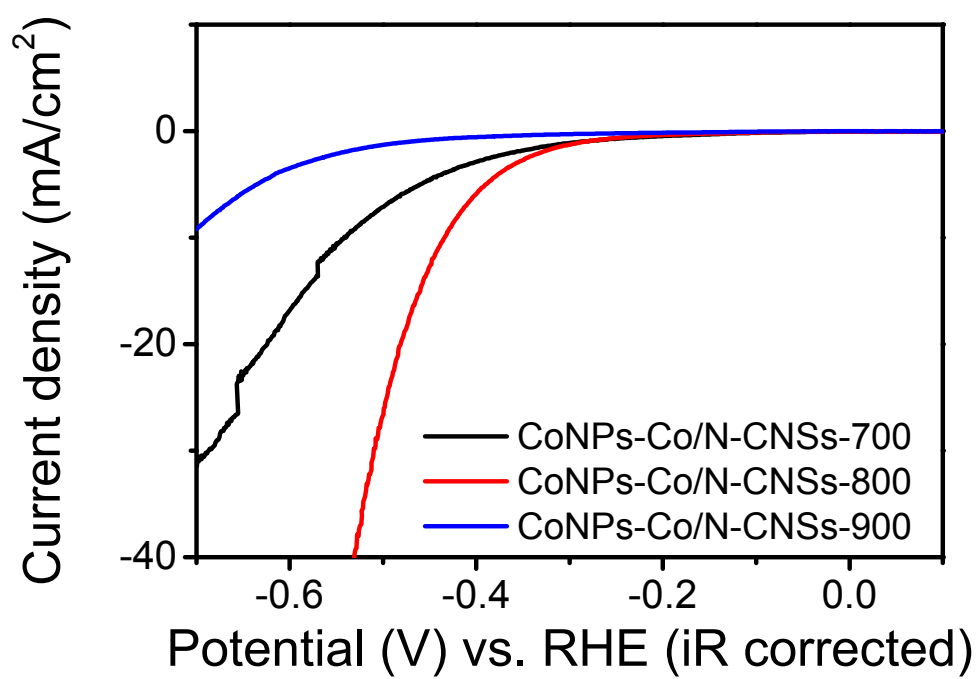

Figure S5. HER LSV curves of CoNPs-Co/N-CNSs-700, CoNPs-Co/N-CNSs-800 and CoNPs-Co/N-CNSs-900.

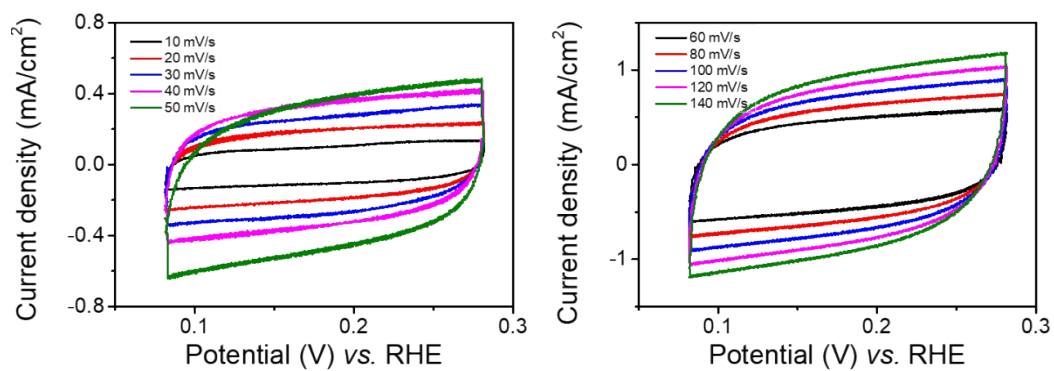

Figure S6. The corresponding CV curves for  $C_{dl}$  in the range of 10 - 140 mV/s where no faradaic reactions occurred.

Table S1. Percentages of elements involved in CoNPs-Co/N-CNSs-800 and Co/N-CNSs.

|                     | <b>C (%)</b> | <b>N (%)</b> | <b>O (%)</b> | <b>Co (%)</b> |
|---------------------|--------------|--------------|--------------|---------------|
| CoNPs-Co/N-CNSs-800 | 92.59        | 1.023        | 4.607        | 1.785         |
| Co/N-CNSs           | 94.076       | 2.144        | 3.573        | 0.208         |

Table S2. ORR and HER performance comparison of biomass-derived electrocatalysts in this work and those reported in the literature.

|                              | <b>ORR half-wave potential</b> | <b>HER overpotential at 10 mA/cm<sup>2</sup></b> | <b>Ref.</b>                                         |
|------------------------------|--------------------------------|--------------------------------------------------|-----------------------------------------------------|
| Co/N-CNSs                    | 0.83 V vs. RHE                 | -0.278 V vs. RHE                                 | This work                                           |
| Co/CNFs                      | 0.896 V vs. RHE                | 0.19 V vs. RHE                                   | <i>Adv. Mater.</i> <b>2019</b> , 31, 1808043        |
| Co@NG-800                    | -                              | -0.286 V vs. RHE                                 | <i>Electrochim. Acta</i> <b>2018</b> , 26, 48       |
| Co-N-PCM                     | 0.82 V vs. RHE                 | -                                                | <i>Carbon</i> <b>2019</b> , 141, 704                |
| CoFe/N-GCT                   | 0.91 V for Pt/C                | -                                                | <i>Angew. Chem. Int. Ed.</i> <b>2018</b> , 57,16166 |
| MoO <sub>2</sub> -FeP@C      | -                              | 0.103 V vs. RHE                                  | <i>Adv. Mater.</i> <b>2020</b> , DOI:10.1002        |
| Co-N <sub>x</sub> @CNF-700   | 0.814 V vs. RHE                | -                                                | <i>J. Power Sources</i> <b>2018</b> , 380, 174      |
| Co-Co <sub>2</sub> P@NPC/rGO | -                              | -0.136 V vs. RHE                                 | <i>Adv. Funct. Mater.</i> <b>2018</b> , 28, 1801332 |
